# Supplementary material for: Spatio-temporal modelling of the first Chikungunya epidemic in an intra-urban setting: The role of socioeconomic status, environment and temperature
Source: PubMed Central journal article supplement (PMC8244893; doi:10.1371/journal.pntd.0009537), 2021-06-18

41=Ramos

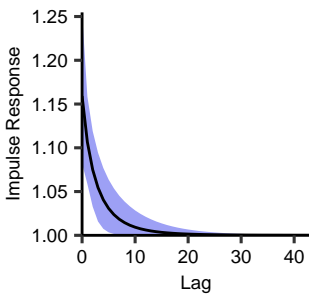

42=Olaria

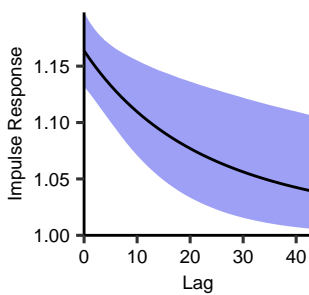

43=Penha

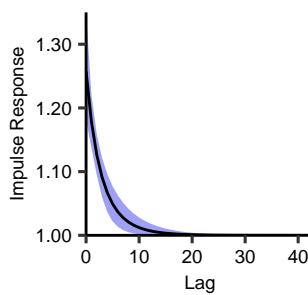

44=Penha Circular

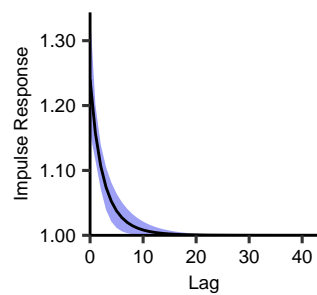

45=Bras De Pina

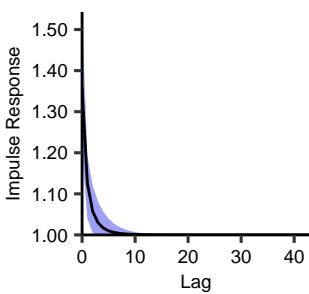

46=Cordovil

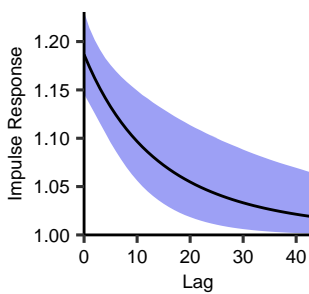

47=Parada De Lucas

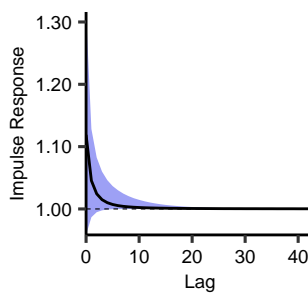

48=Vigario Geral

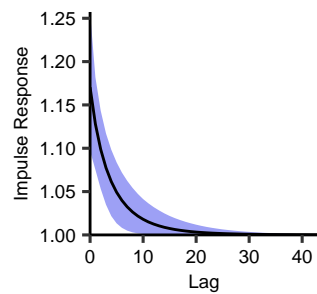

49=Jardim America

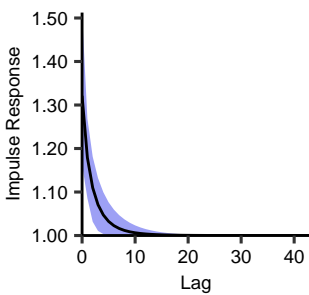

50=Higienopolis

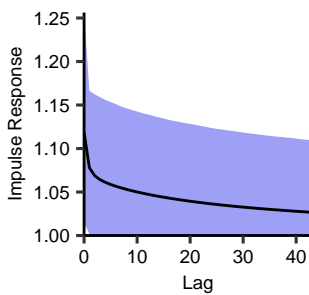

51=Jacare

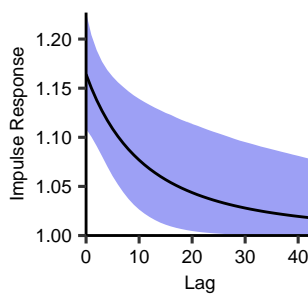

52=Maria Da Graca

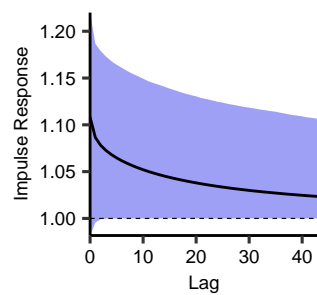

53=Del Castilho

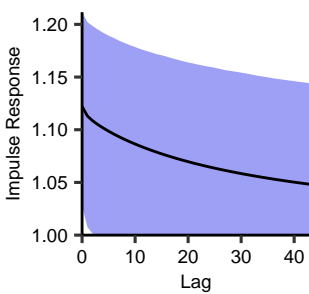

54=Inhauma

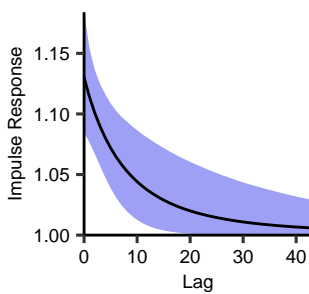

55=Engenho Da Rainha

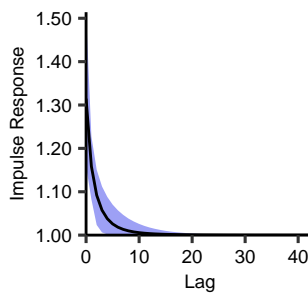

56=Tomas Coelho

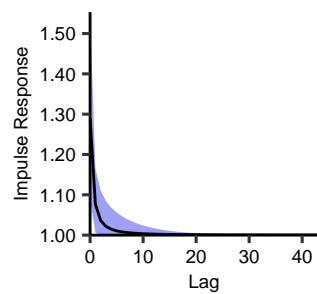

57=Sao Francisco Xavier

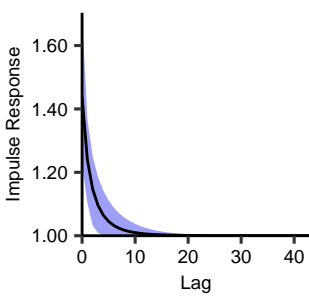

58=Rocha

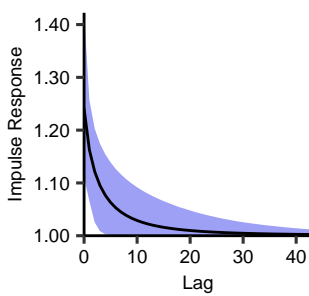

59=Riachuelo

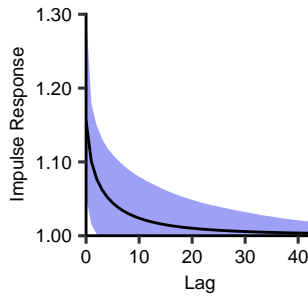

60=Sampaio

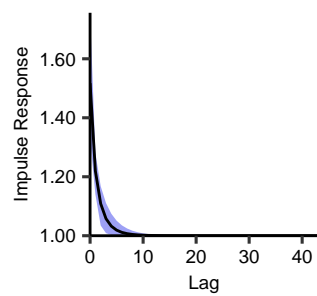

61=Engenho Novo

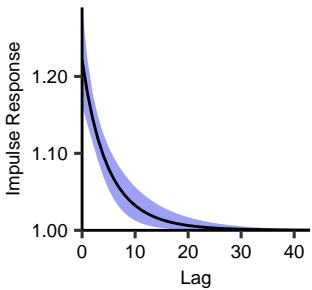

62=Lins De Vasconcelos

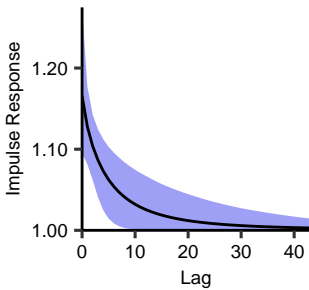

63=Meier

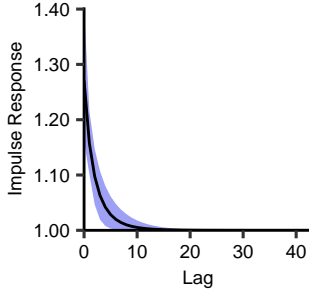

64=Todos Os Santos

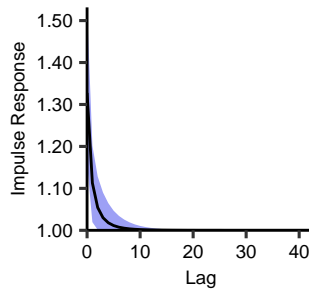

65=Cachambi

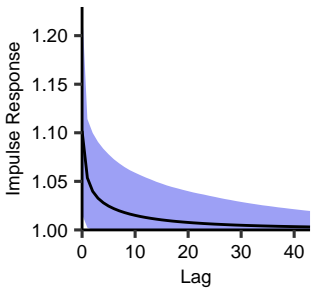

66=Engenho De Dentro

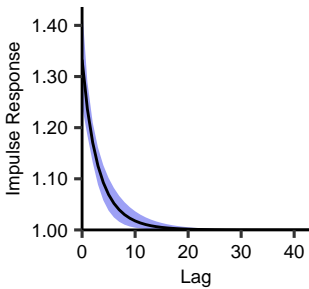

67=Agua Santa

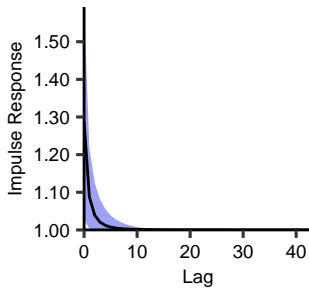

68=Encantado

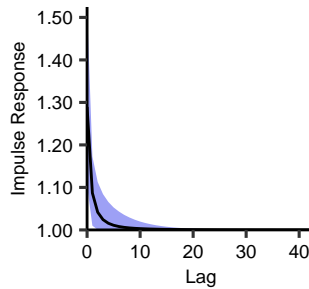

69=Piedade

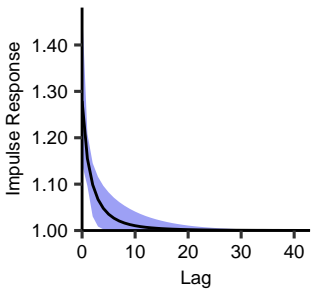

70=Abolicao

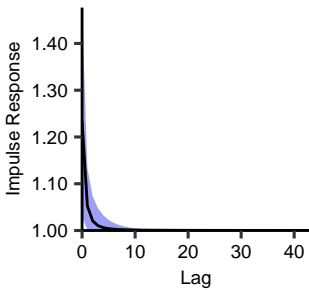

71=Pilares

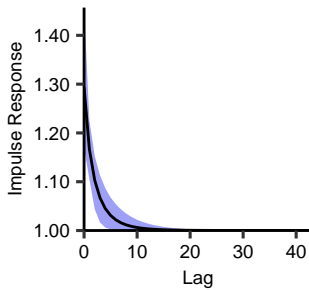

72=Vila Kosmos

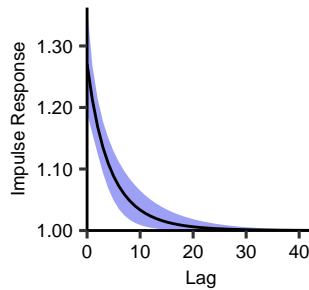

73=Vicente De Carvalho

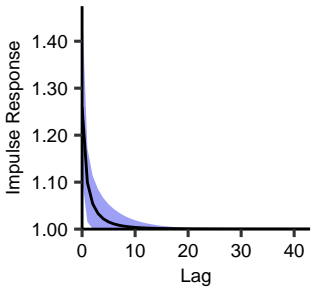

74=Vila Da Penha

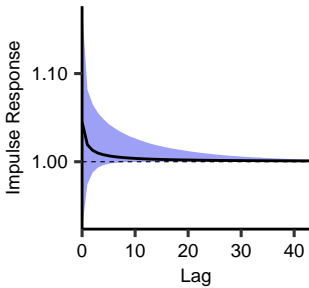

75=Vista Alegre

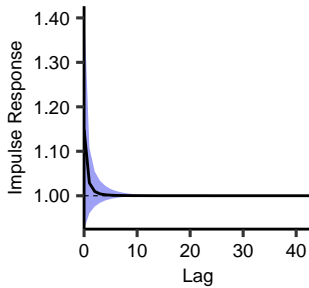

76=Ir aja

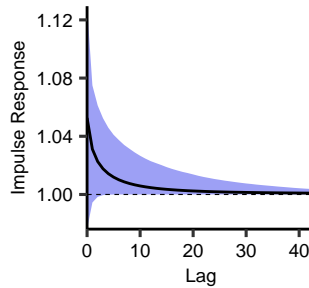

77=Colegio

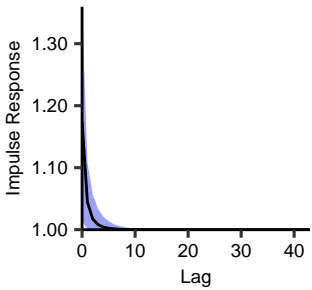

78=Campinho

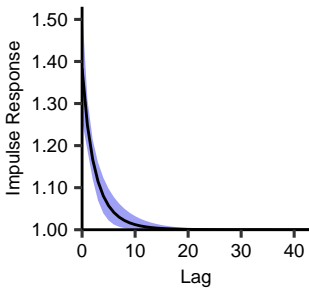

79=Quintino Bocaiuva

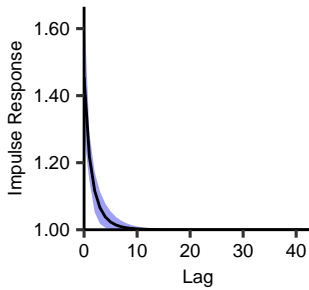

80=Cavalcanti

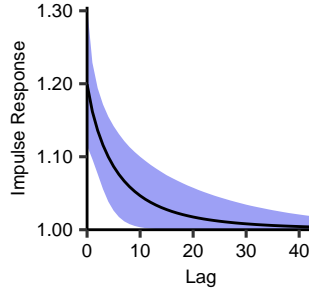



101=Taua

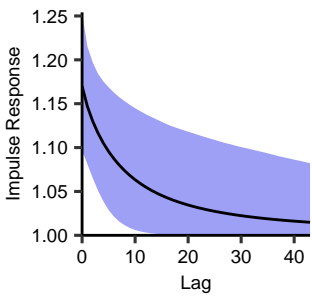

102=Monero

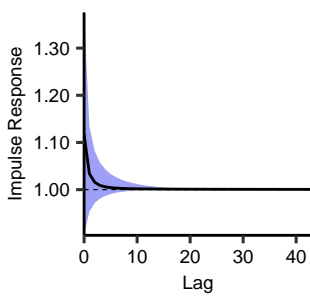

103=Portuguesa

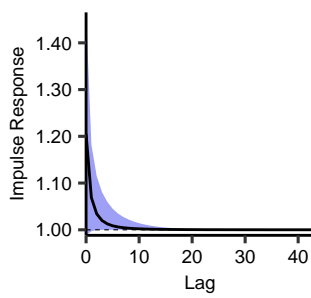

104=Galeao

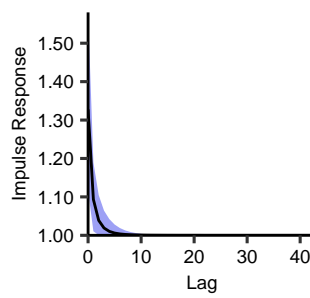

105=Cidade Universitaria

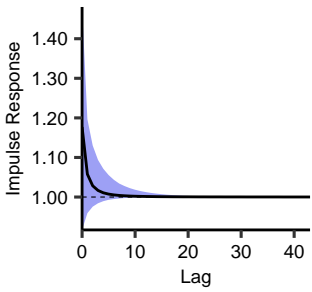

106=Guadalupe

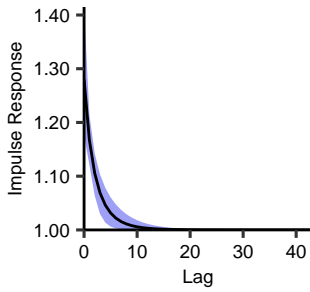

107=Anchieta

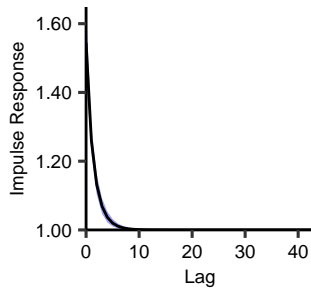

108=Parque Anchieta

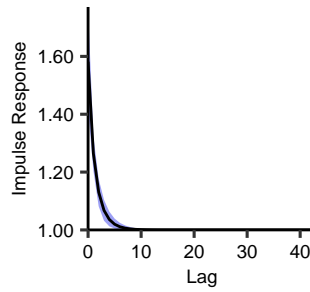

109=Ricardo De Albuquerque

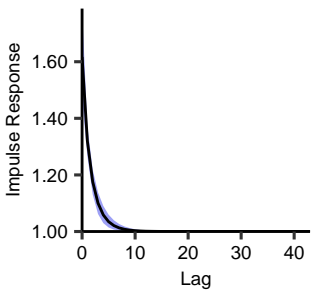

110=Coelho Neto

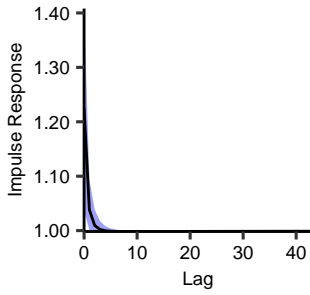

111=Acari

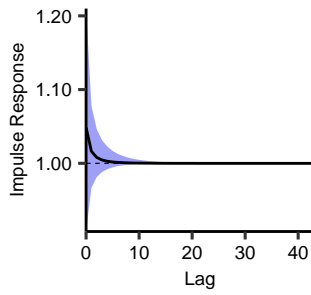

112=Barros Filho

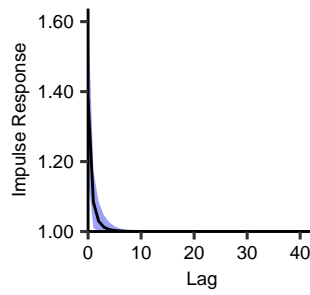

113=Costa Barros

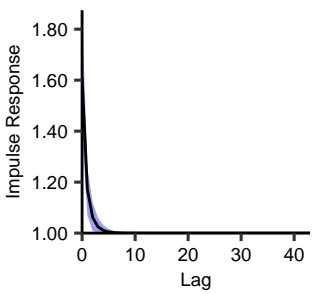

114=Pavuna

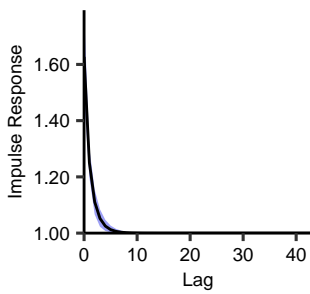

115=Jacarepagua

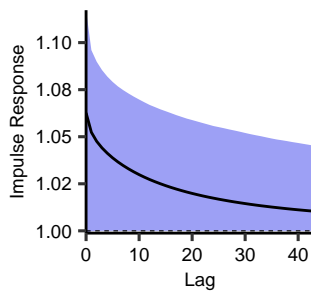

116=Anil

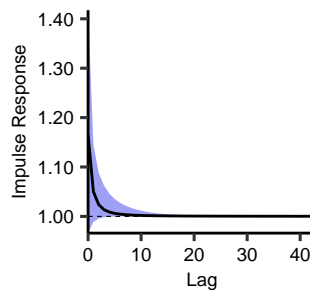

117=Gardenia Azul

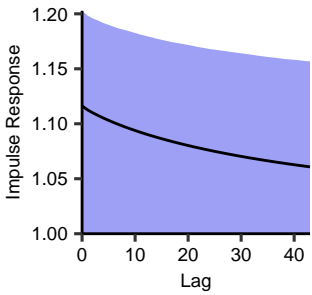

118=Cidade De Deus

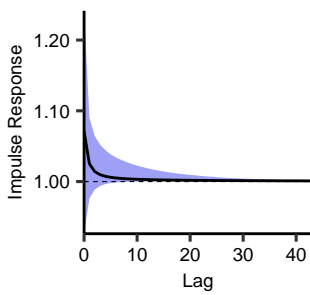

119=Curicica

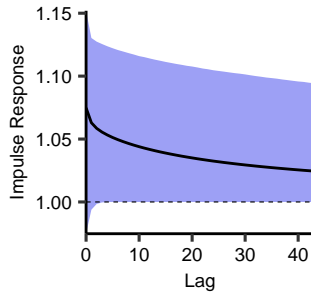

120=Freguesia (Jacarepagua)

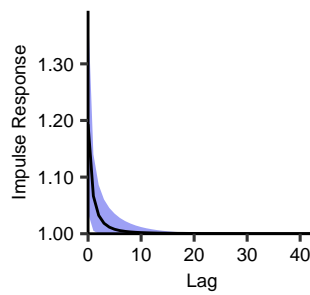

121=Pechincha

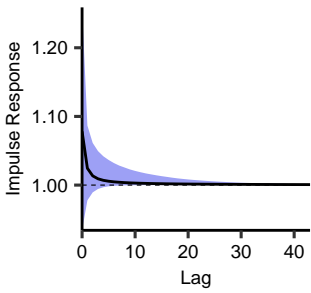

122=Taquara

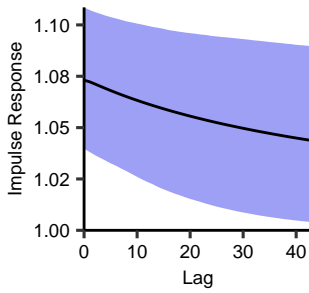

123=Tanque

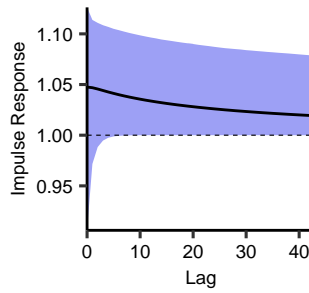

124=Praca Seca

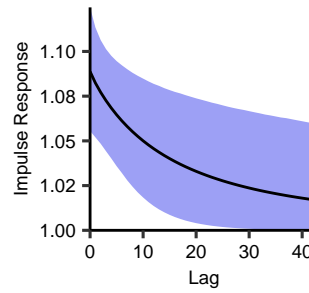

125=Vila Valqueire

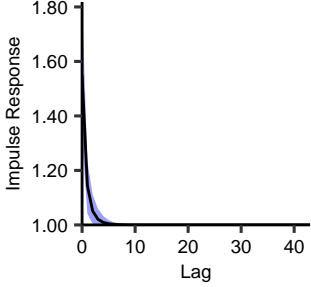

126=Joa

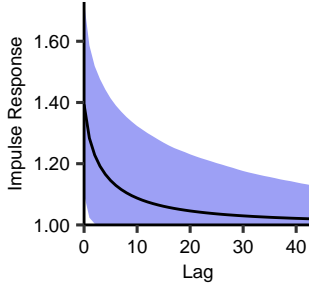

127=Itanhanga

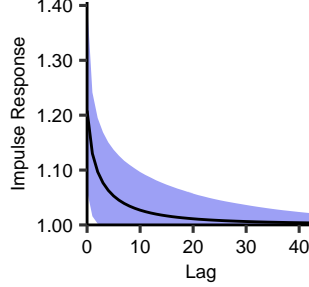

128=Barra Da Tijuca

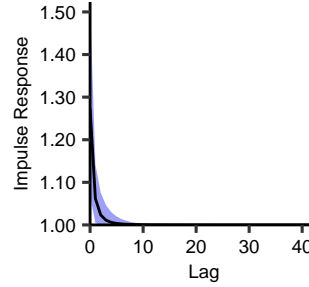

129=Camorim

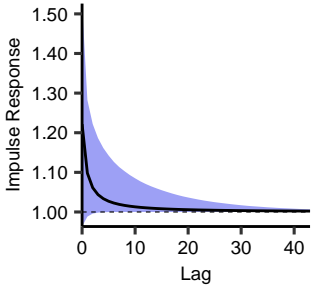

130=Vargem Pequena

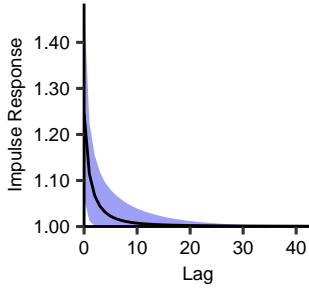

131=Vargem Grande

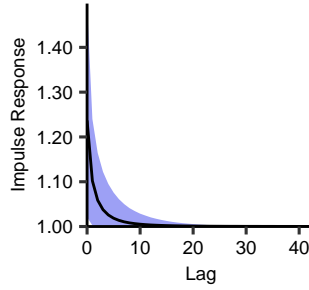

132=Recreio Dos Bandeirantes

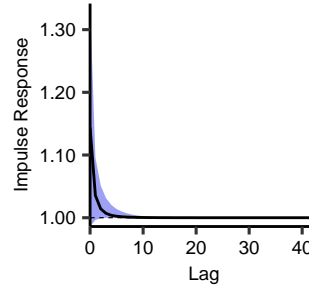

133=Grumari

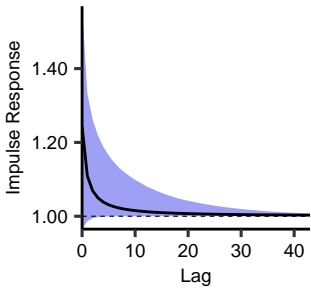

134=Deodoro

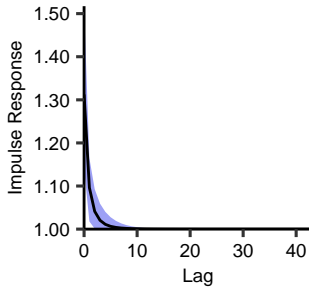

135=Vila Militar

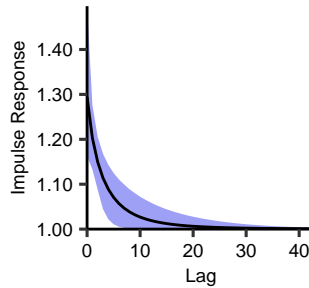

136=Campo Dos Afonsos

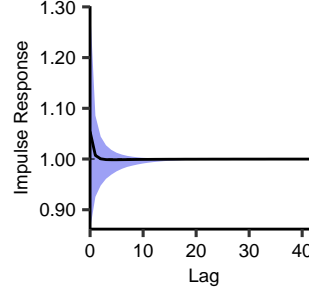

137=Jardim Sulacap

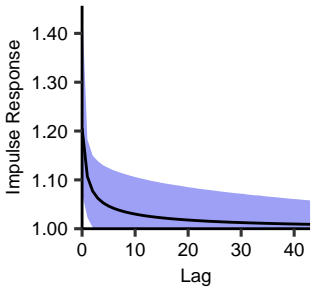

138=Magalhaes Bastos

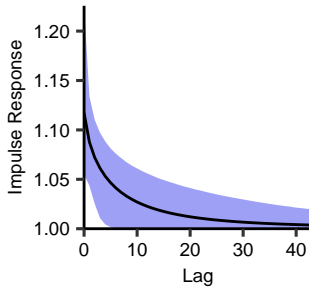

139=Realengo

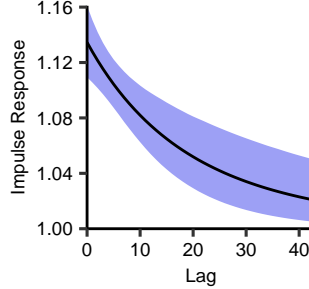

140=Padre Miguel

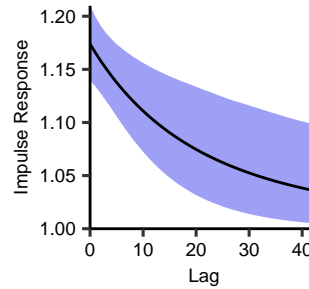

141=Bangu

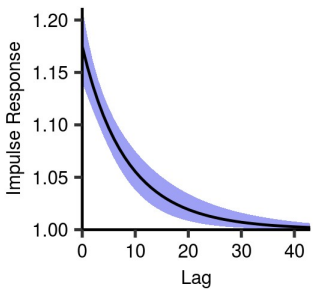

142=Senador Camara

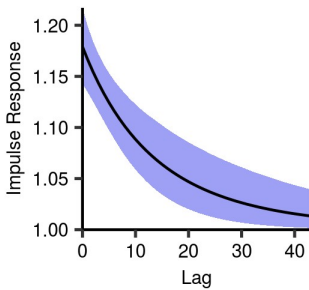

143= Santissimo

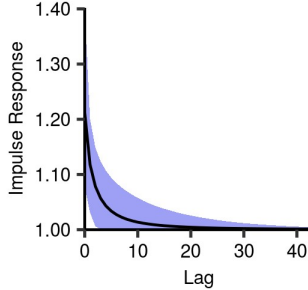

144=Campo Grande

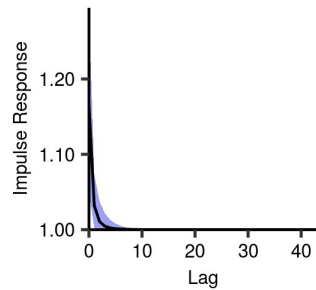

145=Senador Vasconcelos

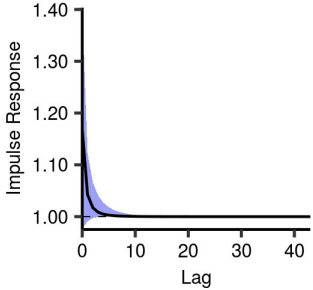

146=Inhoaiba

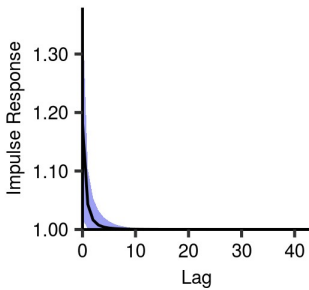

147=Cosmos

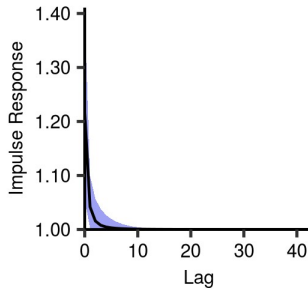

148=Paçiência

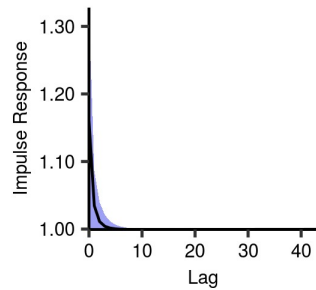

149=Santa Cruz

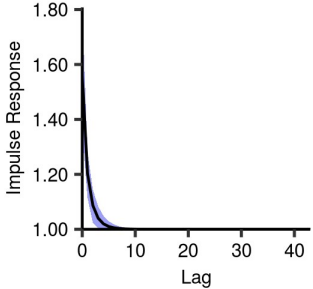

150=Sepetiba

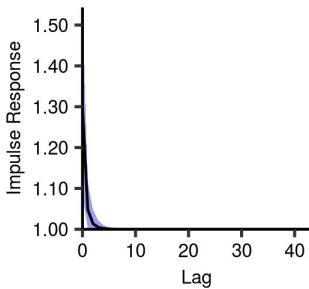

151=Guaratiba

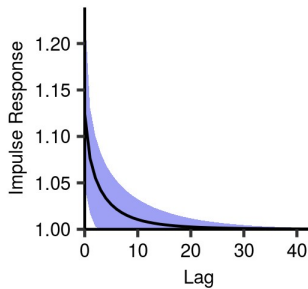

152=Barra De Guaratiba

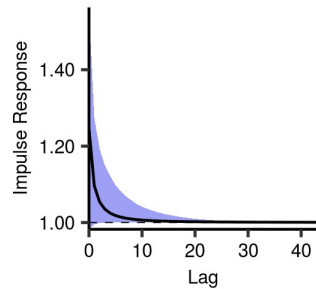

153=Pedra De Guaratiba

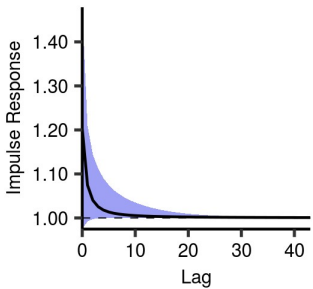

154=Rocinha

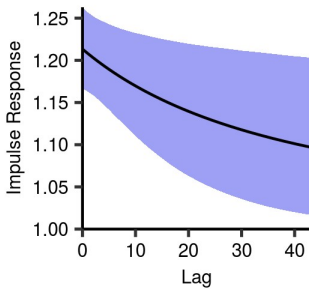

155=Jacarezinho

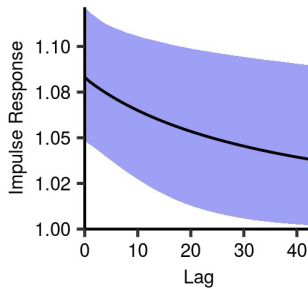

156=Complexo Do Alemão

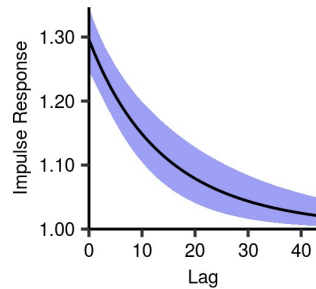

157=Mare

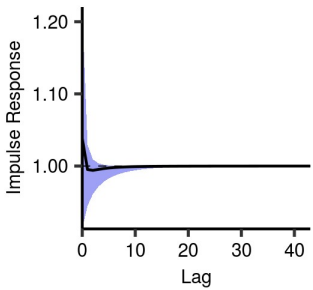

158=Parque Columbia

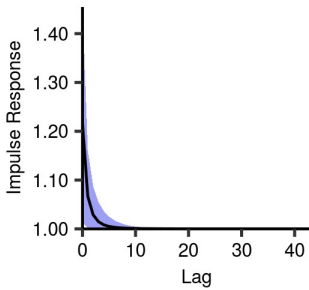

159=Vasco Da Gama

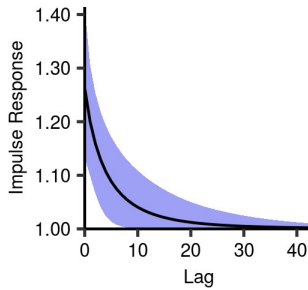

160=Gericino

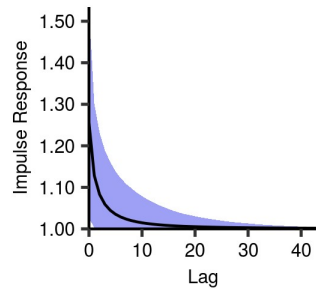

Supplement: pntd.0009537.s004.pdf [file pntd.0009537.s004.pdf]
