# Supplementary material for: Spatio-temporal modelling of the first Chikungunya epidemic in an intra-urban setting: The role of socioeconomic status, environment and temperature
Source: PubMed Central journal article supplement (PMC8244893; doi:10.1371/journal.pntd.0009537), 2021-06-18
Supplement: pntd.0009537.s008.pdf [file pntd.0009537.s008.pdf]

## S1 Appendix

|         |                                                                                                                                                  | WAIC    |
|---------|--------------------------------------------------------------------------------------------------------------------------------------------------|---------|
| Model 0 | $\log(\mu_{i,t}) = \log(e_i) + \beta_0 + \phi_i$                                                                                                 | 34114.6 |
| Model 1 | $\log(\mu_{i,t}) = \log(e_i) + \beta_0 + X'_i \beta_{k,t}$                                                                                       | 26418.3 |
| Model 2 | $\log(\mu_{i,t}) = \log(e_i) + \beta_0 + X'_i \beta_{k,t} + \phi_i$                                                                              | 19656.6 |
| Model 3 | $\log(\mu_{i,t}) = \log(e_i) + \beta_0 + U_{i,t} + \phi_i$<br>$U_{i,t} = \rho_i U_{i,t-1} + \zeta_i \text{Temperature}_{i,t}$                    | *       |
| Model 4 | $\log(\mu_{i,t}) = \log(e_i) + \beta_0 + X'_i \beta_{k,t} + U_{i,t} + \phi_i$<br>$U_{i,t} = \rho_i U_{i,t-1} + \zeta_i \text{Temperature}_{i,t}$ | 17934.8 |

\* Model 3 showed lack of convergence.
